# Supplementary material
Source: MDPI journal article supplement (https://www.mdpi.com/2073-4395/12/8/1824)
Supplement: s1 [file s1]

## Article

# Effects of Biochar on Soil Properties and Tomato Growth

Suzana Ioana Calcan <sup>1,2</sup>, Oana Cristina Pârvulescu <sup>1,\*</sup>, Violeta Alexandra Ion <sup>3,\*</sup>, Cristian Eugen Răducanu <sup>1</sup>, Liliana Bădulescu <sup>3</sup>, Roxana Madjar <sup>3</sup>, Tănase Dobre <sup>1</sup>, Diana Egri <sup>1</sup>, Andrei Moț <sup>3</sup>, Lavinia Mihaela Iliescu <sup>3</sup> and Ionuț Ovidiu Jerca <sup>3</sup>

<sup>1</sup> Chemical and Biochemical Engineering Department, University POLITEHNICA of Bucharest, 1-7 Gheorghe Polizu Str., 011061 Bucharest, Romania; suzanastancescu@yahoo.com (S.I.C.); cristianrdcn1@yahoo.com (C.E.R.); tghdobre@gmail.com (T.D.); diana\_egri@yahoo.com (D.E.)

<sup>2</sup> SCIENT Research Center for Instrumental Analysis, 1 Petre Ispirescu Str., 77167 Tancabesti, Ilfov, Romania

<sup>3</sup> Research Center for Studies of Food and Agricultural Products Quality, University of Agronomic Sciences and Veterinary Medicine of Bucharest, 59 Marasti Blvd., 011464 Bucharest, Romania; lilib\_20@yahoo.com (L.B.); rmadjar@gmail.com (R.M.); mot\_andrei@yahoo.com (A.M.); lavinia.iliescu@qlab.usamv.ro (L.M.I.); ovidiu.jerca@qlab.usamv.ro (I.O.J.)

\* Correspondence: oana.parvulescu@yahoo.com (O.C.P.); violeta.ion.phd@gmail.com (V.A.I.)

## Supplementary materials

**Table S1.** Factor loadings.

| Variable                | PC1           | PC2           |
|-------------------------|---------------|---------------|
| <i>HU</i>               | <b>-0.778</b> | -0.061        |
| <i>BD</i>               | <b>-0.927</b> | 0.202         |
| <i>pH</i>               | <b>0.818</b>  | -0.459        |
| <i>EC</i>               | <b>0.958</b>  | 0.007         |
| <i>C</i>                | <b>0.985</b>  | 0.117         |
| <i>N-NO<sub>3</sub></i> | -0.283        | <b>-0.721</b> |
| <i>N-NH<sub>4</sub></i> | 0.477         | <b>-0.812</b> |
| <i>P</i>                | <b>0.703</b>  | -0.333        |
| <i>K</i>                | <b>0.810</b>  | 0.005         |
| <i>P-AL</i>             | <b>0.805</b>  | 0.000         |
| <i>K-AL</i>             | <b>0.848</b>  | 0.053         |
| <i>Ca</i>               | -0.468        | <b>-0.773</b> |
| <i>Mg</i>               | 0.044         | <b>0.875</b>  |
| <i>Na</i>               | <b>0.884</b>  | 0.410         |

**Table S2.** Factor scores.

| Sample | PC1          | PC2          |
|--------|--------------|--------------|
| S1     | -1.298       | -1.423       |
| S1     | -1.886       | -2.169       |
| S1     | -1.574       | -1.750       |
| S2     | -1.627       | -1.040       |
| S2     | -1.711       | -0.929       |
| S2     | -1.582       | -1.294       |
| S3     | -2.606       | <b>2.800</b> |
| S3     | -2.501       | <b>2.746</b> |
| S3     | -1.773       | <b>2.692</b> |
| BC     | <b>6.606</b> | 0.856        |
| BC     | <b>7.072</b> | 0.433        |
| BC     | <b>6.084</b> | -0.005       |
| S1+BC  | -0.303       | -1.572       |
| S1+BC  | -0.174       | -2.060       |
| S1+BC  | -0.260       | -1.860       |
| S2+BC  | 0.165        | -0.644       |
| S2+BC  | -0.093       | -0.785       |
| S2+BC  | -0.289       | -0.879       |
| S3+BC  | -0.998       | <b>2.607</b> |
| S3+BC  | -0.701       | <b>2.352</b> |
| S3+BC  | -0.553       | <b>1.923</b> |
